# Supplementary material
Source: PubMed Central journal article supplement (PMC3057855)
Supplement: supp_M110.196048_jbc.M110.196048-1.pdf [file supp_M110.196048_jbc.M110.196048-1.pdf]

Supplementary data, table I: Summary of biological potency and efficacy of truncated and mutated CCK2R on CCK-induced inositol phosphate production

\*values were previously determined on Cos-7 cells expressing transiently the CCK2R (17)

All other values were calculated from dose-response curves performed in triplicate on HEK cells expressing transiently CCK2R

|                                     | EC <sub>50</sub> (nM) | E <sub>max</sub><br>(% CCK2R) |
|-------------------------------------|-----------------------|-------------------------------|
| CCK2R                               | 0.53 ± 0.04           | 100                           |
| CCK2R-RLuc                          | 1.30 ± 0.31           | 98 ± 1                        |
| CCK2R-GFP                           | 2.00 ± 0.23           | 94 ± 4                        |
| Δ409-CCK2R                          | 0.16 ± 0.05           | 200 ± 8 *                     |
| Δ429-CCK2R                          | 0.12 ± 0.04           | 207 ± 8 *                     |
| Δ439-CCK2R                          | 0.22 ± 0.03           | 166 ± 3 *                     |
| T427A- CCK2R                        | 0.73 ± 0.05           | 97 ± 5                        |
| S429A-CCK2R                         | 0.66 ± 0.08           | 117 ± 14                      |
| S432A-CCK2R                         | 0.51 ± 0.05           | 98 ± 3 *                      |
| S434A- CCK2R                        | 0.44 ± 0.04           | 95 ± 3 *                      |
| S437A- CCK2R                        | 0.61 ± 0.08           | 94 ± 3 *                      |
| T439A- CCK2R                        | 0.48 ± 0.03           | 99 ± 4 *                      |
| T440A- CCK2R                        | 0.84 ± 0.08           | 105 ± 7                       |
| S442A- CCK2R                        | 0.48 ± 0.09           | 111 ± 8                       |
| T443A- CCK2R                        | 0.59 ± 0.04           | 103 ± 14                      |
| T427A/S429A-CCK2R                   | 0.47 ± 0.05           | 125 ± 8                       |
| S432A/S434A-CCK2R                   | 0.53 ± 0.08           | 113 ± 5                       |
| S442A/T443A-CCK2R                   | 0.74 ± 0.03           | 139 ± 9                       |
| S437A/T439A/T440A-CCK2R             | 0.66 ± 0.07           | 130 ± 15                      |
| S437A/T439A/T440A/S442A/T443A-CCK2R | 0.62 ± 0.01           | 178 ± 23                      |
| polyA-CCK2R                         | 0.78 ± 0.07           | 137 ± 5                       |
