# Supplementary material
Source: PubMed Central journal article supplement (PMC3057855)
Supplement: supp_M110.196048_jbc.M110.196048-2.pdf [file supp_M110.196048_jbc.M110.196048-2.pdf]

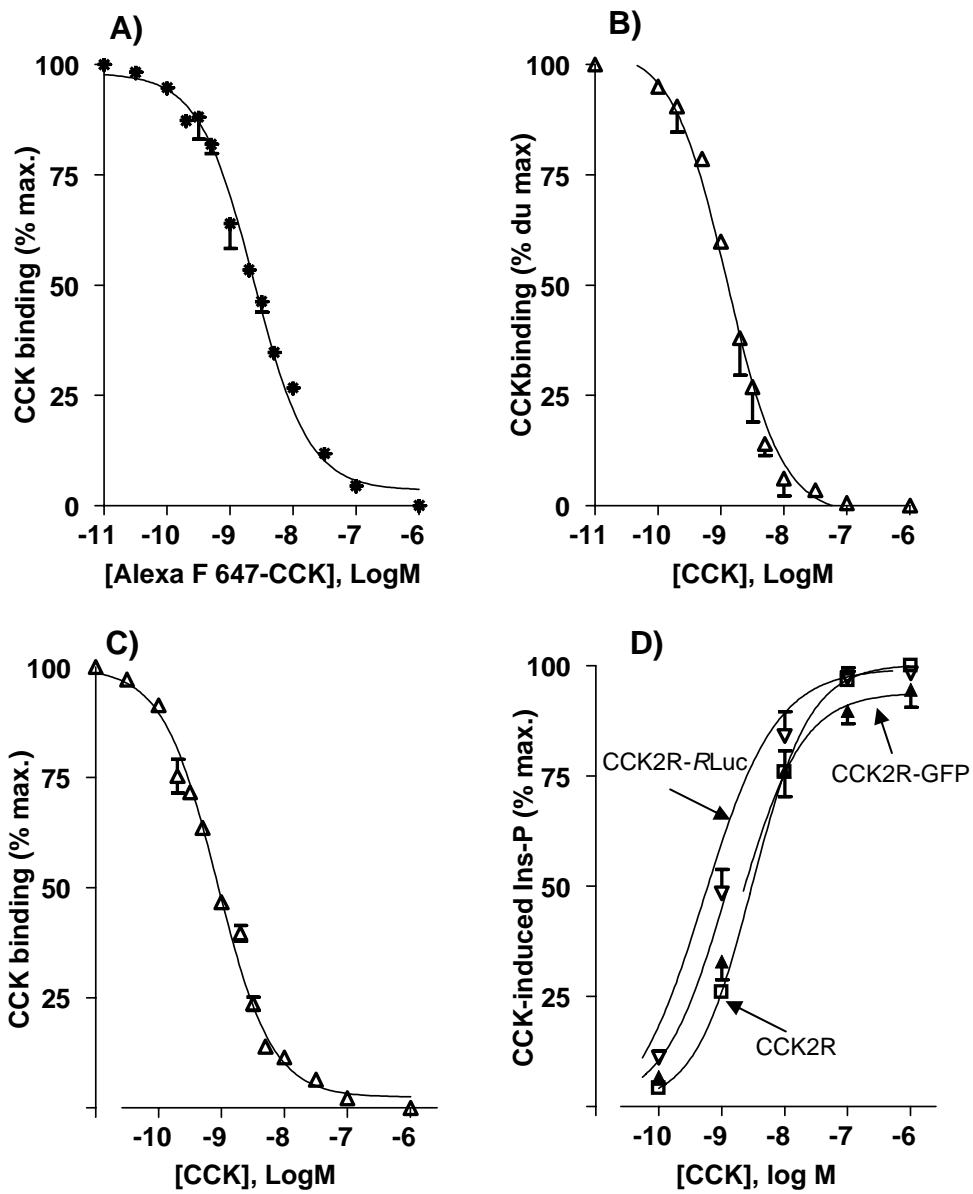

Supplementary data Fig. 1

**Supplementary data, Fig. 1:** Characterization of pharmacological and biological tools.

Panel A: competition binding between  $^{125}\text{I}$ -CCK and Alexa F 647-CCK to CCK2R expressed in HEK 293 cells (Ki:  $2.4 \pm 0.12$  nM for Alexa F 647-CCK versus Kd:  $4.8 \pm 1.0$  for CCK).

Panel B: competition binding between  $^{125}\text{I}$ -CCK and CCK to CCK2R-GFP expressed in HEK 293 cells. CCK2R-GFP bound  $^{125}\text{I}$ -CCK with a dissociation constant (Kd) of  $1.15 \pm 0.20$  nM (versus  $1.17 \pm 0.25$  nM for CCK2R).

Panel C: competition binding between  $^{125}\text{I}$ -CCK and CCK to CCK2R-RLuc expressed in HEK 293 cells. CCK2R-RLuc bound  $^{125}\text{I}$ -CCK with a dissociation constant (Kd) of  $0.90 \pm 0.21$  nM.

Panel D: CCK-stimulated inositol phosphate production in HEK 293 cells expressing the Wild-type CCK2R (  $EC_{50}$ :  $3.1 \pm 0.4$  nM) or CCK2R-GFP (  $EC_{50}$ :  $2.0 \pm 0.2$ ) or CCK2R-RLuc ( $EC_{50}$ :  $1.3 \pm 0.3$  nM).

Results are the mean  $\pm$  SEM of 3-4 experiments.
