# Supplementary material
Source: PubMed Central journal article supplement (PMC3057855)
Supplement: supp_M110.196048_jbc.M110.196048-3.pdf [file supp_M110.196048_jbc.M110.196048-3.pdf]

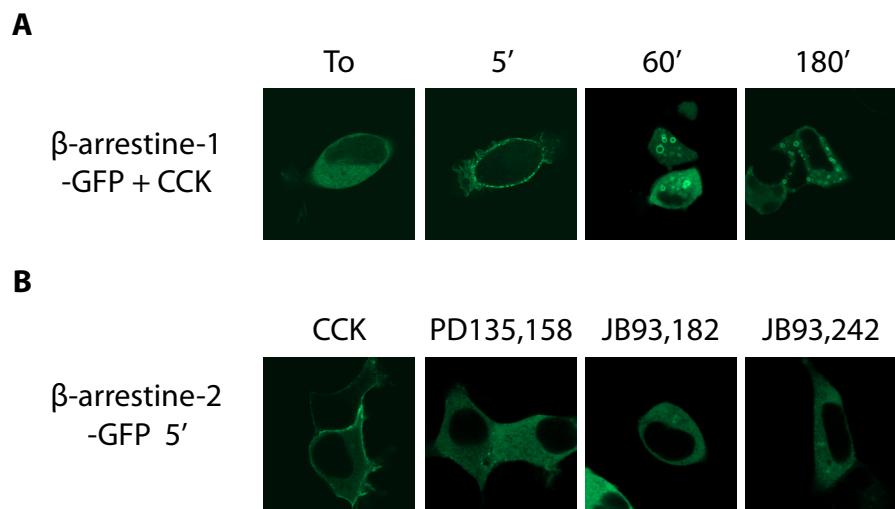

Supplementary data  
Figure 2

**Supplementary data, Fig. 2:** confocal microscopy evidence for CCK-induced recruitment of  $\beta$ -arrestin1 to CCK2R (panel A) and absence of stimulation of this recruitment with PD135,158, JB93,182 or JB93242 (panel B). Experimental conditions as in Fig. 5. Images are representative of at least 3 separate experiments
