# Supplementary material
Source: PubMed Central journal article supplement (PMC3057855)
Supplement: supp_M110.196048_jbc.M110.196048-4.pdf [file supp_M110.196048_jbc.M110.196048-4.pdf]

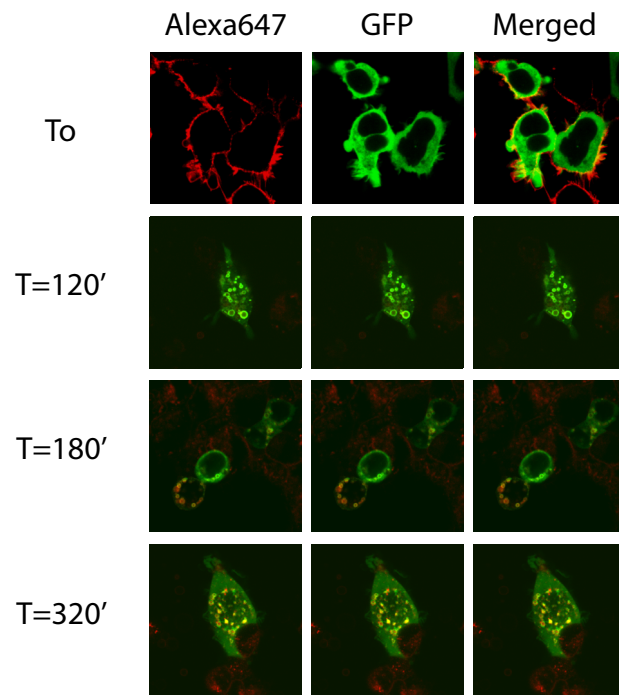

Supplementary data  
Figure 3

**Supplementary data, Fig. 3:** confocal microscopy evidence for co-localization of Alexa F 647-CCK-labeled CCK2R with  $\beta$ -arrestin-2-GFP during endocytosis and intracellular trafficking.
